# Supplementary material for: Facile hermetic TEM grid preparation for molecular imaging of hydrated biological samples at room temperature
Source: Springer Nature journal article supplement (doi:10.1038/s41467-023-41266-x), 2023-09-13
Supplement: 41467_2023_41266_MOESM3_ESM.pdf [file 41467_2023_41266_MOESM3_ESM.pdf]

## **Description of additional supplementary files**

Supplementary Video 1: Selected particles in the electron tomography tilt series and their corresponding IPET 3D reconstructions.

Supplementary Video 2: Tilt series of the HeLa cell obtained with liquid cell TEM and its corresponding IPET 3D reconstruction
